# Sequence-Based Predictions of Lipooligosaccharide Diversity in the *Neisseriaceae* and Their Implication in Pathogenicity

Daniel C. Stein<sup>1\*</sup>, Clinton J. Miller<sup>1</sup>, Senthil V. Bhoopalan<sup>1</sup>, Daniel D. Sommer<sup>2</sup>

<sup>1</sup> Department of Cell Biology and Molecular Genetics, University of Maryland, College Park, Maryland, United States of America, <sup>2</sup> Institute for Advanced Computer Studies, University of Maryland, College Park, Maryland, United States of America

## Abstract

Endotoxin [Lipopolysaccharide (LPS)/Lipooligosaccharide (LOS)] is an important virulence determinant in gram negative bacteria. While the genetic basis of endotoxin production and its role in disease in the pathogenic *Neisseria* has been extensively studied, little research has focused on the genetic basis of LOS biosynthesis in commensal *Neisseria*. We determined the genomic sequences of a variety of commensal *Neisseria* strains, and compared these sequences, along with other genomic sequences available from various sequencing centers from commensal and pathogenic strains, to identify genes involved in LOS biosynthesis. This allowed us to make structural predictions as to differences in LOS seen between commensal and pathogenic strains. We determined that all neisserial strains possess a conserved set of genes needed to make a common 3-Deoxy-D-manno-octulosonic acid -heptose core structure. However, significant genomic differences in glycosyl transferase genes support the published literature indicating compositional differences in the terminal oligosaccharides. This was most pronounced in commensal strains that were distally related to the gonococcus and meningococcus. These strains possessed a homolog of heptosyltransferase III, suggesting that they differ from the pathogenic strains by the presence a third heptose. Furthermore, most commensal strains possess homologs of genes needed to synthesize lipopolysaccharide (LPS). *N. cinerea*, a commensal species that is highly related to the gonococcus has lost the ability to make sialyltransferase. Overall genomic comparisons of various neisserial strains indicate that significant recombination/genetic acquisition/loss has occurred within the genus, and this muddles proper speciation.

**Citation:** Stein DC, Miller CJ, Bhoopalan SV, Sommer DD (2011) Sequence-Based Predictions of Lipooligosaccharide Diversity in the *Neisseriaceae* and Their Implication in Pathogenicity. PLoS ONE 6(4): e18923. doi:10.1371/journal.pone.0018923

**Editor:** Dipshikha Chakravorty, Indian Institute of Science, India

**Received:** January 21, 2011; **Accepted:** March 11, 2011; **Published:** April 18, 2011

**Copyright:** © 2011 Stein et al. This is an open-access article distributed under the terms of the Creative Commons Attribution License, which permits unrestricted use, distribution, and reproduction in any medium, provided the original author and source are credited.

**Funding:** This work was supported by grants from the National Institutes of Health to DCS, grant number AI073667 and DDS LM006845. The funder had no role in study design, data collection and analysis, decision to publish, or preparation of the manuscript.

**Competing Interests:** The authors have declared that no competing interests exist.

\* E-mail: dcstein@umd.edu

## Introduction

Lipopolysaccharide (LPS) or its naturally occurring variant lipooligosaccharide (LOS) is an essential outer membrane component of gram negative bacteria (see [1] for a recent review). LOS differs from LPS in that LOS naturally lacks the O-repeating carbohydrate polymer. Both LOS and LPS contain a core polysaccharide that is covalently linked to lipid A. Most enzymes responsible for the biosynthesis of these molecules have been identified, and the genes can be identified in most gram-negative bacteria based on genetic homology to biochemically characterized proteins. The structure of LPS differs from one bacterium to another, with its composition defined by the biochemistry of the various proteins.

In the *Neisseriaceae*, LOS expression undergoes high frequency structural variation [2], with the variation in the polysaccharide being implicated in pathogenesis [3]. It has been extensively characterized through a variety of structural [4,5,6,7,8], biochemical [9,10,11,12,13,14] and genetic methods [15,16,17,18,19]. Its impact on neisserial biology is broad, affecting both the organisms basic biological properties [20] and the influence the organism has on the host [21,22,23,24,25]. Neisserial LOS is composed of lipid A, which anchors the oligosaccharide chains to the membrane, an

inner core composed of two 3-Deoxy-D-manno-octulosonic acid (KDO) residues and two heptose residues, and an oligosaccharide extension from the inner core. Inner core residues connect the outer core to the lipid A anchor. The data in Figure 1 represent a structural schematic and genetic summary of variation in carbohydrate structures that have been seen in LOS isolated from pathogenic strains. In *N. gonorrhoeae* and *N. meningitidis*, the genes responsible for the production of LOS are found at seven genomic locations: *kdtA*, containing the gene needed to add the two KDOs onto the lipid A core [26]; *rfaC* whose product adds a heptose residue to KDO [27]; *lgtF* and *rfaK*, which encode for genes responsible for the initiation of the  $\alpha$  chain and synthesis of the  $\gamma$  chain [28]; *rfaF*, adds a second heptose residue to the first heptose [29]; *lgtABCDE*, which encodes for the bulk of the genes responsible for the extension of the  $\alpha$  chain [30]; *lgtG*, which encodes the gene responsible for the synthesis of the  $\beta$  chain [16]; and *lst*, which can add a sialic acid cap to the oligosaccharide chain [31]. To date, no genes involved in LOS biosynthesis in commensal organisms have been described.

Commensal *Neisseria* have been shown to serve as a source of genetic diversity in the genus [32,33,34]. Genomic studies on *N. lactamica* have found regions of horizontally acquired DNA and the presence of many *N. meningitidis* virulence-associated genes [35,36].

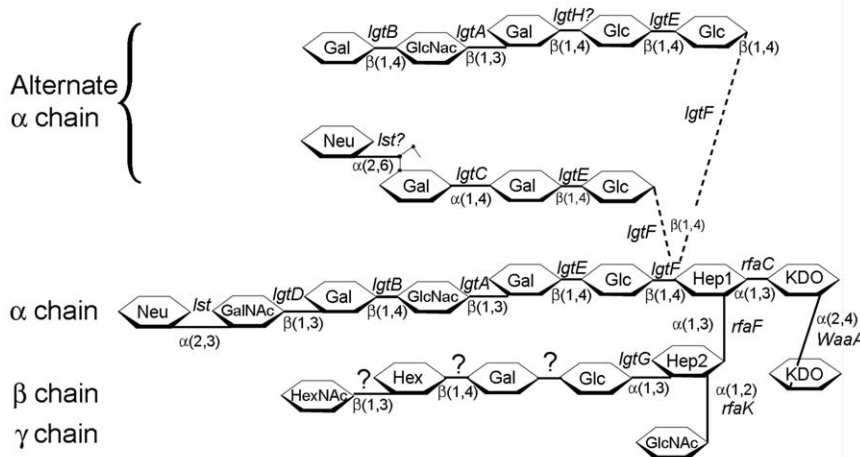

**Figure 1. LOS structures found in pathogenic *Neisseria* strains.** The structure of LOS presented in this figure is a composite derived from several published structures of neisserial LOS [5,6,8,15,28,30,44,49,59,60,61].  
doi:10.1371/journal.pone.0018923.g001

A few studies have analyzed the LOS produced by the commensal *Neisseria* and the data indicate that LOS heterogeneity extends beyond what is seen in the gonococcus and meningococcus [37,38]. These findings suggest that alternative LOS structures are present in commensal *Neisseria*. In this study, we compared the genomic content of various commensal and pathogenic *Neisseria* strains, with respect to LOS biosynthesis in order to assess the degree of genomic variability in LOS biosynthetic genes. Given the role of transformation in driving genomic variability and the nature of the flanking genes in most LOS biosynthetic loci in the pathogens, we hypothesized that we could use DNA sequence conservation in genes flanking LOS biosynthesis genes to identify regions important in LOS biosynthesis in commensal organisms. This paper represents a genomic analysis of commensal neisserial DNA sequences derived in our laboratory and in published databases.

## Results

### Presence of KDO transferase (WaaA)

The key sugar that connects core sugars to lipid A is KDO. KDO transferases are multifunctional enzymes that are able to transfer several KDO residues from CMP-KDO to different precursor molecules forming different linkages. The DNA sequence of *waaA* from *N. meningitidis* [39] was used to search the various databases containing both pathogenic and commensal genomic DNA sequences. The data in Figure 2, panel A indicate that all strains examined contained a gene that would likely encode this KDO transferase. The degree of amino acid sequence identity in the pathogenic strains was quite high, exceeding 98% identity in all strains. The two organisms that are closely related to these pathogenic strains, *N. cinerea* and *N. lactamica* showed an intermediate level of homology. However, the homology in all of the commensal strains exceeded 75% identity.

The biochemical specificity of WaaA is quite diverse: in *Haemophilus influenzae*, it is monofunctional [40]; in *Escherichia coli* it is bifunctional [41]; while in *Chlamydiaceae* it is at least trifunctional [42]. We used the WaaA sequence of *E. coli* or *H. influenzae* to search the available translated neisserial DNA sequences and found that these proteins were very similar,

with homology between the proteins seen across the entire protein sequence. Searches using the *Chlamydia trachomatis* WaaA revealed that this protein was much less similar to the neisserial WaaA, with homologies strongest in the middle of the protein.

In *Haemophilus spp.*, the second KDO is functionally replaced by a phosphate through the action of a kinase, KdkA [43]. We searched the neisserial genomes for the presence of *kdkA*. Since we were unable to identify any ORFs with significant homology to KdkA, we concluded that the neisserial WaaA is a bifunctional enzyme. This would indicate that LOS isolated from commensal and pathogenic *Neisseria* strains should all possess two KDO residues. This is supported by all structural data on neisserial LOSs, which indicate that they all possess two KDO residues [7,44,45,46,47,48,49].

### Presence of heptosyl transferases

RfaC is required to add heptose I onto KDO in most microorganisms. We used the DNA sequence of *rfaC* [27] to search the various neisserial genomes for the presence of *rfaC*. The data in Figure 3 indicate that all neisserial strains possess an *rfaC* homolog. The genomic organization of *rfaC* was conserved in all neisserial species with the flanking genes sharing significant nucleotide similarities (Figure 3, panel A), even though the ascribed functions are unrelated to LOS biosynthesis.

In the gonococcus, the predicted amino acid sequence of *rfaC* was virtually identical in all 16 strains examined, with a total of three differences observed, one each in three strains (Figure 3, panel B). The amino acid sequences of the meningococcus differed significantly more, with 27 variable residues found in only eight strains. Variation in protein sequence was even more diverse when we analyzed the *rfaC* sequence of *N. lactamica* or other commensal organisms. While we observed significant amino acid sequence variability, we also noted that the terminal sequence of the protein varied significantly, due to mutations in the stop codon found in the pathogens, with readthrough adding between 4 and 16 amino acids to the protein. It is unclear why the sequence is so conserved in the gonococcus, while the variation in other strains is more consistent with what is seen with most LOS biosynthetic genes.

In the gonococcus, the gene *rfaF* is responsible for the addition of the second heptose onto heptose 1 [18]. We used the DNA

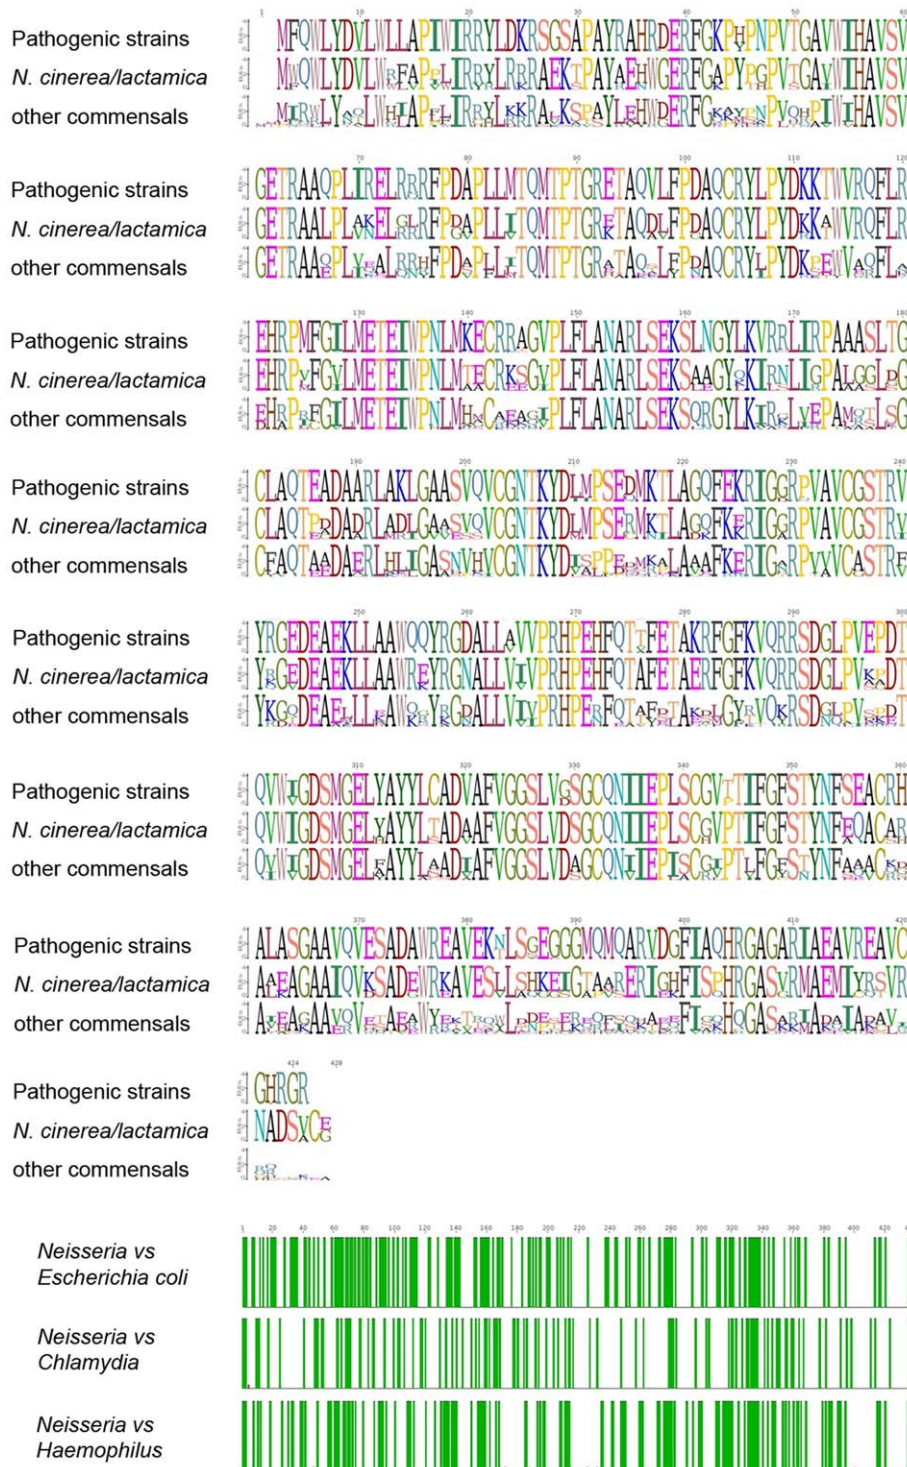

**Figure 2. Analysis of KDO transferases from various *Neisseria* strains.** Panel A is a Sequence Logo created using the predicted amino acid sequences of *rfaC* from various neisserial strains. The DNA sequences used for this analysis were *N. gonorrhoeae* strains; 1291, 35/02, DGI18, DG12, F62, FA19, FA6140, MS11, PID1, PID18, PID24-1, PID332, SK-92-679 and SK-93-1035 [sequences from the Broad Institute], FA1090 (accession number AE004969); and NCCP11945 (Accession number CP001050). The DNA sequences for *N. meningitidis* were NS44 (DCS, unpublished sequence), 053442 (accession number CP000381), FAM18 (accession number AM421808), 22491 (accession number AL157959-1), MC58 (accession number AE002098.2), alpha 14 (accession number AM889136.1). Commensal Neisserial strain DNA sequences were: *Neisseria cinerea* ATCC 14685 (accession number ACDY000000000); *N. elongata* subsp. glycolytica ATCC 29315 (accession number ADBF000000000); *N. flavescens* strain SK114 (accession number ACQV000000000) and strain NRL30031/H210 (accession number ACEN000000000); *N. lactamica* ATCC 23970 (accession number ACEQ000000000), Y92-1009 (Project ID: 50739), ST-640 (Project ID: 13472), and strain NS19 (DCS, unpublished sequence); *N. mucosa* ATCC 25996 (accession number ACDX000000000) and C102 (Project ID: 38747); *N. polysaccharea* ATCC 43768 (accession number ADBE000000000) and NS342 (DCS, unpublished sequence); *N. sicca* ATCC 29256 (accession number ACKO000000000), 4320 (DCS, unpublished sequence) and D51 (DCS, unpublished sequence); *Neisseria* sp. oral taxon 014 str. F0314 (Project ID: 49701); and *N. subflava* NJ9703 (accession number ACEO000000000). The DNA sequences for



*Haemophilus influenzae* were: Rd KW20 (accession number L42023), 86-028NP (accession number CP000057), PittEE (accession number CP000671) and PittGG (accession number CP000672). The DNA sequences for *Chlamydia trachomatis* were: strain 434/Bu (accession number B0B9V8) and strain A/HAR-13 (accession number Q3KMF4). doi:10.1371/journal.pone.0018923.g002

sequence from this gene to search the various nucleotide databases for similar predicted proteins. All strains possessed a predicted protein with greater than 88% similarity across the entire ORF. This indicates that all neisserial LOS should possess at least two heptose residues in their LOS. More interesting was the degree of genomic variability in the regions surrounding *rfaF* (see Figure 4).

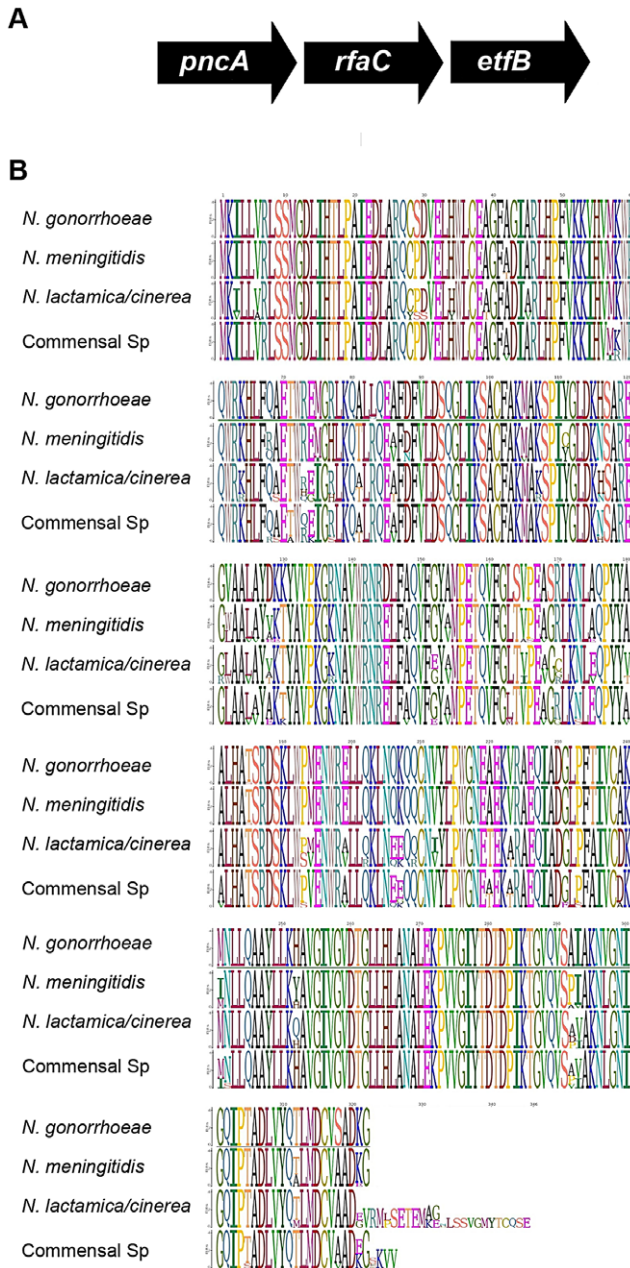

**Figure 3. Analysis of the *rfaC* region in the *Neisseriaceae*.** Panel A. Genomic organization of the *rfaC* region. The gene *pncA* encodes pyrazinamidase/nicotinamidase, and the gene *etfB* encodes an electron transfer protein. Panel B is a Sequence Logo alignment of the *rfaC* gene from the various sequenced neisserial strains. doi:10.1371/journal.pone.0018923.g003

The genomic organization was identical in all gonococcal and meningococcal strains, as well as in the *N. lactamica* and *N. cinerea*. However, in the commensal strains the organization varied significantly. *N. polysaccharea* possessed an organization similar to that of the pathogens, but had an insertion of a gene with significant homology to *glgB*, an enzyme involved in glucan branching [50]. All of the other commensal strains examined had one of three organizations. Since sequence divergence between the same *Neisseria* spp. is very different at different genetic loci [51], some form of selective pressure has selected for the maintenance of *rfaF*. This demonstrates the importance of the presence of the second heptose in the survival of the organism.

### Elongation of the alpha chain with LgtF

The pathogenic strains possess the ability to make three alternate alpha chains. The first protein needed to elongate the alpha chain is LgtF. In the pathogens, *lgtF* is part of a two gene cluster that is linked to *rfaK*. We analyzed the genomic organization of this region in the various neisserial species. The data in Figure 5 indicate that the genomic order was conserved in the pathogenic strains, and those closely related to them. In *N. elongata* we were able to identify a clear homolog of *lgtF*. However, the downstream gene, while possessing clear homology to a glycosyl transferase, was different from *rfaK*. While this novel glycosyl transferase was found in all of the other strains examined, it was found as a fusion protein to another glycosyl transferase. In addition, the flanking genomic organization of this novel glycosyl transferase differed significantly in the various strains. These data suggest that the commensal strains elongate their LOS via a sugar other than glucose.

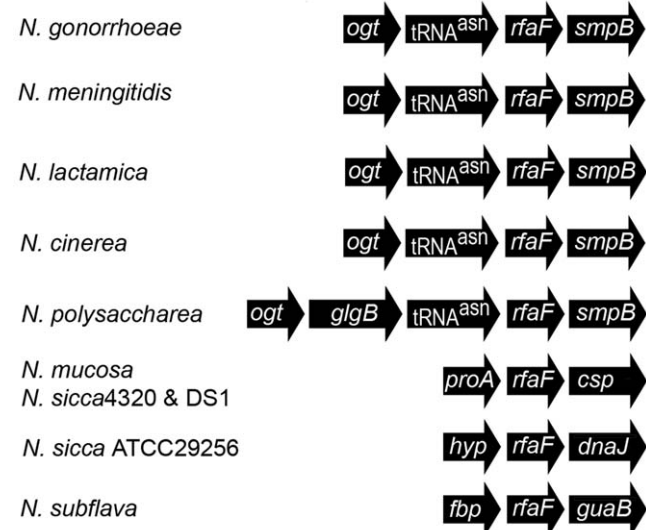

**Figure 4. Analysis of the *rfaF* region in the *Neisseriaceae*.** The flanking genes encode: *ogt*, O<sup>6</sup>-methylguanine-DNA methyltransferase; *smpB*, RNA-binding protein, *proA*, gamma-glutamylphosphate reductase, *csp*, cold shock protein; *hyp*, hypothetical protein; *dnaJ*, Heat shock protein; *flp*, recombinase; and *guaB*; inosine 5'-monophosphate dehydrogenase. doi:10.1371/journal.pone.0018923.g004

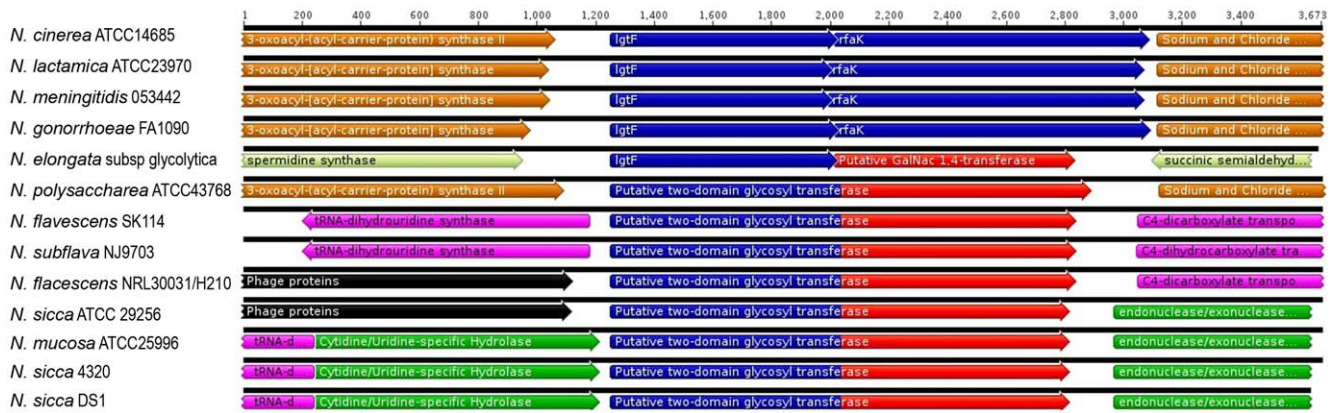

**Figure 5. Genomic organization of genes that initiate synthesis of the alpha chain.** Accession numbers are the same as in Figure 2. doi:10.1371/journal.pone.0018923.g005

### Presence of gamma chain N-acetylglucosamine transferase

We used the sequence of the FA1090 *rfaK* gene to search the translated genomic sequences of the *Neisseriaceae*. The data in Table 1 demonstrate that all gonococcal and meningococcal strains possessed a protein with 100% homology to the test sequence. In addition, predicted proteins with 95% or greater homology were found in *N. lactamica*, *N. cinerea* and one strain of *N. polysaccharea*. The genomic organization in strains that possessed *lgtF* and *rfaK* were conserved in these strains, containing the same flanking genes. All other commensal strains did not possess the ability to produce proteins with significant homology to RfaK. Database searches of the two flanking genes were identified in all databases, but the two genes did not appear to be linked. This indicates that only the pathogenic neisserial strains, and those closely related possess the ability to synthesize a gamma chain.

The predicted structure of *N. sicca* 4320 core LOS contains three heptose residues [49]. Therefore, we searched the neisserial

genomes using the *E. coli* DH1 heptosyl transferase III amino acid sequence. All neisserial strains that lacked RfaK, possessed a gene with a predicted homology of >50% identity with *E. coli* Heptosyl transferase III. When this sequence was used to search the NCBI database using genomic blast, three types of homology with various *Neisseria* strains was observed; High homology with greater than 67% identify and 83% similarity (identifying putative heptosyl transferase III proteins); and two classes of genes with limited homology, which corresponded to heptosyl transferase I and II. From genomic analysis of the inner core region of all neisserial strains, the data indicate that the strains possess two basic core structures; one where they possess a gamma chain N-acetylglucosamine and one that contains a third heptose.

### Modification of neisserial LOS with sialic acid

Sialylation of neisserial LOS leads to increased virulence of the organism [52]. In order for an organism to sialylate its LOS, it needs to possess a sialyltransferase (Lst), and an appropriate acceptor sugar. We used the amino acid sequence for FA1090 Lst to search the various sequence databases for the presence of Lst proteins. All gonococcal and meningococcal strains possessed predicted proteins with greater than 97% identity with FA1090 Lst. Surprisingly, *N. polysaccharea* and *N. lactamica* possessed sialyltransferase proteins, while *N. cinerea* and all of the other commensal organisms lacked the gene. The data in Figure 6 indicate the genomic organization of the various strains. This data demonstrate that *N. cinerea* had deleted the coding sequence for *lst*, as it possesses flanking DNA sequences which are virtually identical to those seen in the pathogens. It is possible that the inability of *N. cinerea* to cause disease may be explained in part by the fact that it lacks Lst, as it possesses all of the genes needed to synthesize the LOS structures that have been shown to be important for virulence.

### Synthesis of the alpha chain variants

In the pathogenic strains, the alpha chain has some significant genomic diversity, with deletions and/or recombination of some of the genes needed for its synthesis commonly being seen [53]. The data in Figure 7 indicate that with the exception of *N. lactamica*, *N. cinerea* and *N. polysaccharea*, none of the commensals possessed any genes found in this cluster. However, they did contain the flanking genes as linked genes. This demonstrates that the alpha chain in commensal organisms is encoded by unique genes, and should have structures different from the pathogens. This is consistent with published compositional data [38].

**Table 1. Presence of heptosyl transferase genes.**

| Strain                             | <i>rfaK</i> | <i>rfaC</i> | <i>waaQ</i> |
|------------------------------------|-------------|-------------|-------------|
| Gonococci                          | +           | +           | -           |
| Meningococci                       | +           | +           | -           |
| <i>N. cinerea</i> ATCC 14685       | +           | +           | -           |
| <i>N. lactamica</i> ATCC 23970     | +           | +           | -           |
| <i>N. lactamica</i> NS19           | +           | +           | -           |
| <i>N. lactamica</i> (Sanger)       | +           | +           | -           |
| <i>N. polysaccharea</i>            | +           | +           | -           |
| <i>N. polysaccharea</i> NS342      | -           | +           | +           |
| <i>N. mucosa</i> ATCC 25996        | -           | +           | +           |
| <i>N. flavescens</i> NRL30031/H210 | -           | +           | +           |
| <i>N. sicca</i> 4320               | -           | +           | +           |
| <i>N. sicca</i> DS1                | -           | +           | +           |
| <i>N. sicca</i> ATCC 29256         | -           | +           | +           |
| <i>N. subflava</i> NJ9703          | -           | +           | +           |

<sup>+</sup>Presence of gene sequence.

<sup>-</sup>Absence of gene sequence.

doi:10.1371/journal.pone.0018923.t001

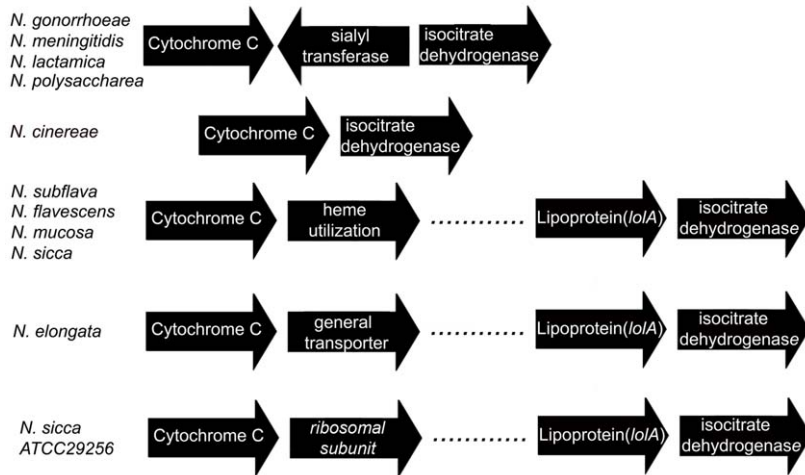

**Figure 6. Genomic organization of regions that might contain *lst*.** The presence of the *lst* gene in the genomes of the various neisserial strains was determined by search the genomes with the gonococcal *Lst* protein sequence (Accession number AAC44539). In strains that did not contain the *Lst* protein, the genomes were search with the flanking Orfs (cytochrome c or isocitrate dehydrogenase). These genes were identified in the genomes, and the flanking gene to these identified by performing a Blast search of the adjacent ORF.  
doi:10.1371/journal.pone.0018923.g006

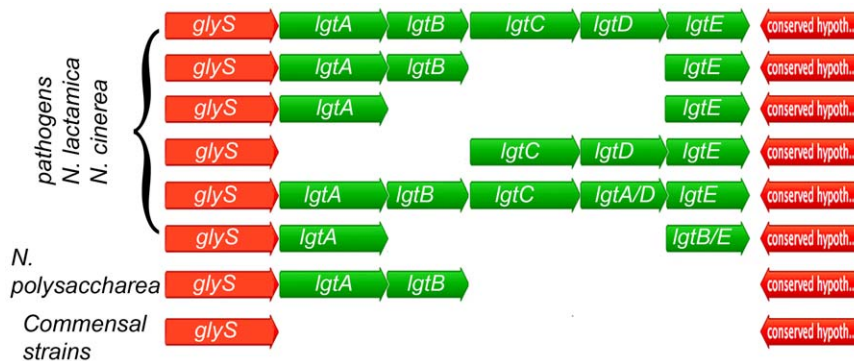

**Figure 7. Genomic organization of the *lgt* gene cluster.** The *lgt* gene cluster in *N. gonorrhoeae* strain F62 is flanked by two ORFs, glycyl tRNA synthase and a conserved hypothetical protein. Various organizational structures of the *lgt* genes were found in the pathogens, *N. lactamica*, *N. cinerea*, and *N. polysaccharea*, as indicated. All other commensal organisms tested had the glycyl tRNA synthase and a conserved hypothetical protein adjacent to each other.  
doi:10.1371/journal.pone.0018923.g007

**Table 2.** Genomic similarity of putative LPS biosynthetic genes.

| Organism                           | O-antigen polymerase/ligase | Chain length determinant protein | Putative Wza(Complex polysaccharide transport) | LPS biosynthesis translocase | LPS biosynthesis oxidoreductase | 4-a-glucano transferase | 1,4-a-glucan-branching enzyme |
|------------------------------------|-----------------------------|----------------------------------|------------------------------------------------|------------------------------|---------------------------------|-------------------------|-------------------------------|
| <i>N. sicca</i> DS1                | 96.3% <sup>a</sup>          | 97.6%                            | 93.8%                                          | 97.4%                        | 94.4%                           | 93.9%                   | 95.6%                         |
| <i>N. sicca</i> ATCC 29256         | 76.9%                       | 85.0%                            | 96.6%                                          | 70.8%                        | 94.4%                           | 94.0%                   | 99.0%                         |
| <i>N. mucosa</i> ATCC 25996        | 96.6%                       | 97.4%                            | 93.8%                                          | 96.9%                        | 94.1%                           | 93.8%                   | 96.2%                         |
| <i>N. subflava</i> NJ9703          | 70.1%                       | 76.4%                            | 78.9%                                          | 72.0%                        | NP <sup>b</sup>                 | 76.0%                   | 86.0%                         |
| <i>N. flavescens</i> NRL30031/H210 | 71.6%                       | 76.8%                            | 47.0%                                          | 76.8%                        | NP                              | 85.6%                   | 85.6%                         |
| <i>N. polysaccharea</i> NS342      | NP                          | NP                               | NP                                             | NP                           | NP                              | 81.7%                   | 88.3%                         |
| <i>N. lactamica</i> NS19           | NP                          | NP                               | NP                                             | NP                           | NP                              | NP                      | NP                            |
| <i>N. cinerea</i> ATCC 14685       | NP                          | NP                               | NP                                             | NP                           | NP                              | NP                      | NP                            |
| <i>N. meningitidis</i>             | NP                          | NP                               | NP                                             | NP                           | NP                              | NP                      | NP                            |
| <i>N. gonorrhoeae</i>              | NP                          | NP                               | NP                                             | NP                           | NP                              | NP                      | NP                            |

<sup>a</sup>Percentage listed is the degree of similarity between the tested gene and the homolog found in *N. sicca* 4320.

<sup>b</sup>NP indicates that no homolog was present.

doi:10.1371/journal.pone.0018923.t002

### Identification of regions unique to *N. sicca* 4320

*N. sicca* 4320 expresses an LPS. Because it was possible that the O-repeat biosynthetic genes are only found in *N. sicca* 4320, ORFs unique to *N. sicca* 4320 were identified by comparing *N. sicca* 4320 genomic DNA with *N. meningitidis* MC58 and/or the gonococcal genomes (see Table 2). One region was identified that possessed gene homologs to two glycosyl transferases, an O-antigen ligase, a chain length determinant protein, and LPS transport proteins, genes that appeared to be homologs of genes involved in LPS biosynthesis (see Figure 8). The G+C content and the codon usage seen in this region were consistent with other genomic regions

found in these organisms. Further analysis of these regions indicated that the region in 4320 was largely intact in most commensal strains, but missing in the pathogens. Another region identified contained two glycosyl transferases that were unique to *N. sicca* 4320. Since *N. sicca* 4320 produces an LPS with a disaccharide O-repeat, this region would appear likely to encode for LPS biosynthesis. It is interesting to note that all strains retained the genes that appeared to be involved in LOS transport, while losing the genes needed by LPS biosynthesis. This suggests that pathogen evolution has been driven by the loss of the ability to produce LPS.

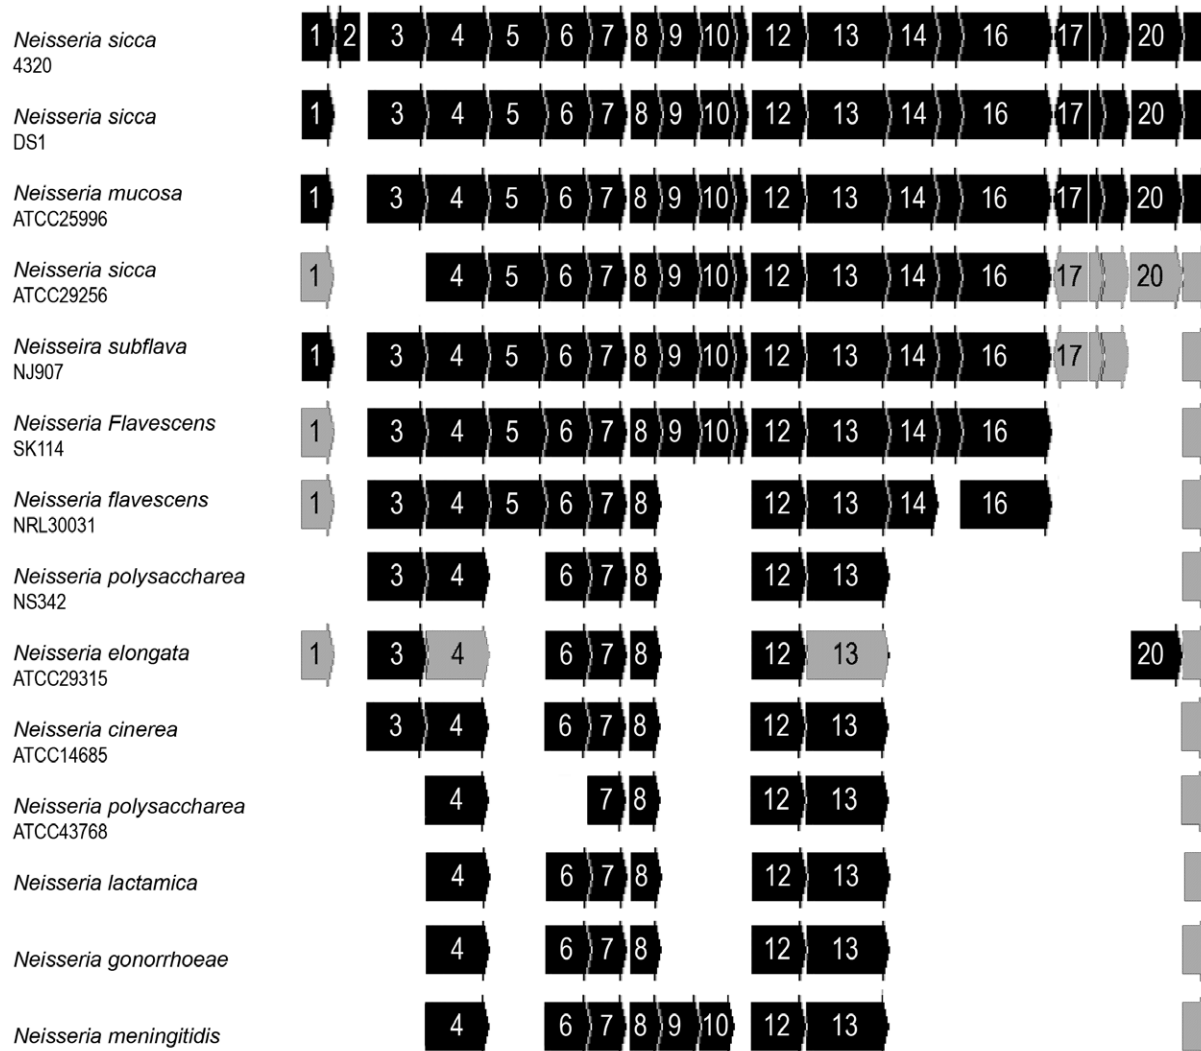

**Figure 8. Genomic organization of the putative LPS biosynthetic gene cluster.** The numbers contained within the arrows refer to open reading frames found on Contig 56 that contained genes with homology to LPS biosynthetic genes. There were 21 ORFs. ORFs 11, 15, 18, 19 and 21 are not numbered as they were too small to fit in the figure. All ORFs were compared to the organization as seen in strain *N. sicca* 4320. A solid black ORF indicates that the gene was found in the designated location. A stippled ORF indicates that the gene is present in a location elsewhere on the chromosome. Missing ORFs were not found in the test organism. All strains are as designated. If no species identification is present, it indicates that all strains had the same genomic organization. The numbers located in the ORFs refer to the following proteins, which had the highest degree of similarity to proteins found in the NCBI database: 1) Rrf2-linked NADH-flavin reductase; 2) Unknown protein; 3) UDP-glucose dehydrogenase; 4) Lipopolysaccharide biosynthesis translocase; 5) Oligosaccharide repeat unit polymerase Wzy; 6) Capsular polysaccharide biosynthesis glycosyl transferase capM; 7) Glycosyl transferase; 8) UDP N-acetyl galactosaminyl transferase; 9) Putative carbamoyl phosphate synthase large subunit, short form; 10) 2-Haloalkanoic acid dehalogenase; 11) Methionyl tRNA formyl transferase; 12) Pleiotropic regulatory protein; 13) Nucleoside-diphosphate sugar epimerase; 14) Polysaccharide export protein (Wza); 15) Low-molecular weight protein-tyrosine phosphatase (Wzb); 16) Tyrosine-protein kinase (Wzc); 17) CidA-associated membrane protein CidB; 18) Holin-like protein CidA; 19) LysR family regulatory protein CidR; 20) Oxidoreductase; 21) Oxygen-insensitive NAD(P)H nitroreductase/Dihydropteridine reductase.  
doi:10.1371/journal.pone.0018923.g008



## Discussion

This study was undertaken to determine the genetic potential of the *Neisseriaceae* with respect to LPS/LOS expression. The data indicate that neisserial LOS possesses two basic core structures; one that possesses a gamma chain N-acetylglucosamine and one that contains a third heptose. The presence of the third heptose was found in strains that rarely caused disease, while the presence of the gamma chain N-acetylglucosamine was associated with pathogens. However, two commensal strains expressed a gamma chain N-acetylglucosamine, *N. lactamica* and *N. cinerea*. The inability of *N. lactamica* (most closely related to *N. meningitidis*) to cause disease relates to its inability to express a capsule. We would suggest that the inability of *N. cinerea* to cause disease is related to its inability to sialylate its LOS, however other factors may also be involved and/or responsible for the avirulence of this strain.

The importance of LOS in neisserial pathogenesis is illustrated by the high degree of sequence conservation in the genes needed for LOS biosynthesis in the pathogens. It is further substantiated by the presence of homopolymeric runs of guanines in key genes involved in LOS biosynthesis, which leads to phase variable expression of LOS. We were unable to identify any homopolymeric runs, or other repeated sequences in commensal LOS biosynthetic genes, suggesting that the expression of LOS in commensal strains is invariant. The alteration in LOS structure seen in the commensal organisms suggests that the third heptose modification may play an important role in modulation LOS/LPS mediated toxicity. We are currently exploring the role of this modification on LOS and LPS, to determine its importance in immunological signaling.

## Methods

### Commensal *Neisseria* sequencing

Chromosomal DNA for *N. sicca* 4320, *N. sicca* DS1, *N. polysaccharae* 342, *N. sicca* NS19, and *N. meningitidis* 44 was isolated using the method described in Maniatis et al. [54]. The DNA sequence of each of these samples was determined by the Genomics Resource Center at the University of Maryland School of Medicine, Baltimore, MD. The sequence reads were assembled using Newbler [55] to generate a set of contigs for each

## References

- Wang X, Quinn PJ (2010) Lipopolysaccharide: Biosynthetic pathway and structure modification. *Prog Lipid Res* 49: 97–107.
- Apicella MA, Shero M, Jarvis GA, Griffiss JM, Mandrell RE, et al. (1987) Phenotypic variation in epitope expression of the *Neisseria gonorrhoeae* lipooligosaccharide. *Infect Immun* 55: 1755–1761.
- Zhang P, Schwartz O, Pantelic M, Li G, Knazze Q, et al. (2006) DC-SIGN (CD209) recognition of *Neisseria gonorrhoeae* is circumvented by lipooligosaccharide variation. *J Leukoc Biol* 79: 731–738.
- Yamasaki R, Kerwood DE, Schneider H, Quinn KP, Griffiss JM, et al. (1994) The structure of lipooligosaccharide produced by *Neisseria gonorrhoeae*, strain 15253, isolated from a patient with disseminated infection: Evidence for a new glycosylation pathway of the gonococcal lipooligosaccharide. *J Biol Chem* 269: 30345–30351.
- Wakarchuk WW, Gilbert M, Martin A, Wu Y, Brisson JR, et al. (1998) Structure of an alpha-2,6-sialylated lipooligosaccharide from *Neisseria meningitidis* immunotype L1. *Eur J Biochem* 254: 626–633.
- Gibson BW, Melaugh W, Phillips NJ, Apicella MA, Campagnari AA, et al. (1993) Investigation of the structural heterogeneity of lipooligosaccharides from pathogenic *Haemophilus* and *Neisseria* species and of R-type lipopolysaccharides from *Salmonella typhimurium* by electrospray mass spectrometry. *J Bacteriol* 175: 2702–2712.
- Gibson BW, Webb JW, Yamasaki R, Fisher SJ, Burlingame AL, et al. (1989) Structure and heterogeneity of the oligosaccharides from the lipopolysaccharides of a pyocin-resistant *Neisseria gonorrhoeae*. *Proc Natl Acad Sci U S A* 86: 17–21.
- John CM, Griffiss JM, Apicella MA, Mandrell RE, Gibson BW (1991) The structural basis for pyocin resistance in *Neisseria gonorrhoeae* lipooligosaccharides. *J Biol Chem* 266: 19303–19311.
- Piekarowicz A, Stein DC (2002) Biochemical properties of *Neisseria gonorrhoeae* LgtE. *J Bacteriol* 184: 6410–6416.
- O'Connor ET, Piekarowicz A, Swanson KV, Griffiss JM, Stein DC (2006) Biochemical analysis of Lpt3, a protein responsible for phosphoethanolamine addition to lipooligosaccharide of pathogenic *Neisseria*. *J Bacteriol* 188: 1039–1048.
- Gilbert M, Cunningham AM, Watson DC, Martin A, Richards JC, et al. (1997) Characterization of a recombinant *Neisseria meningitidis* alpha-2,3-sialyltransferase and its acceptor specificity. *Eur J Biochem* 249: 187–194.
- Lairson LL, Chiu CP, Ly HD, He S, Wakarchuk WW, et al. (2004) Intermediate trapping on a mutant retaining alpha-galactosyl transferase identifies an unexpected aspartate residue. *J Biol Chem*.
- Persson K, Ly HD, Dieckelmann M, Wakarchuk WW, Withers SG, et al. (2001) Crystal structure of the retaining galactosyltransferase LgtC from *Neisseria meningitidis* in complex with donor and acceptor sugar analogs. *Nat Struct Biol* 8: 166–175.
- Wakarchuk W, Martin A, Jennings MP, Moxon ER, Richards JC (1996) Functional relationships of the genetic locus encoding the glycosyltransferase enzymes involved in expression of the lacto-N-neotetraose terminal lipopolysaccharide structure in *Neisseria meningitidis*. *J Biol Chem* 271: 19166–19173.
- Tong Y, Arking D, Ye S, Reinhold B, Reinhold V, et al. (2002) *Neisseria gonorrhoeae* strain PID2 simultaneously expresses six chemically related lipooligosaccharide structures. *Glycobiology* 12: 523–533.
- Banerjee A, Wang R, Uljohn S, Rice PA, Gotschlich EC, et al. (1998) Identification of the gene (*lgtG*) encoding the lipooligosaccharide  $\beta$  chain synthesizing glucosyl transferase from *Neisseria gonorrhoeae*. *Proc Natl Acad Sci U S A* 95: 10872–10877.

commensal. The genomic sequences were submitted to NCBI: *N. sicca* 4320, GenomeProject ID #60861; *N. sicca* DS1, GenomeProject ID #60863; *N. polysaccharae* 342, GenomeProject ID #60865; *N. lactamica* NS19, GenomeProject ID #60867; and *N. meningitidis* 44, GenomeProject ID #60869.

### Mummer alignments

Unique regions of the contig sequences of *N. sicca* 4320 were determined by alignment with the contig sequences of the other identified commensals using Nucmer, a component of the Mummer software package [56]. The alignments were filtered to remove repeat alignments leaving a 1-to-1 alignment between *N. sicca* 4320 and the other sequenced commensal. Regions not aligning were identified as unique to *N. sicca* 4320.

### Geneious

The contig sequences of the commensals were imported into the program Geneious. Custom BLAST databases of each sequenced commensal were compiled to use for further analysis. Geneious was used to manage all sequences and to construct the sequence figures found in this manuscript [57].

### ORF annotation

The contig sequences were analyzed by the program Glimmer3 and putative ORFs predicted [58]. The amino acid sequences of the predicted ORFs were extracted and used as queries in BLAST searches of the various NCBI and custom databases.

### Bioinformatic BLAST screen of *Neisserial* sequence

The custom commensal BLAST databases were searched to identify sequences with similarity to glycosyltransferases. ORFs showing similarity to the sequences were used as a query in a BLAST search of the nr database to confirm similarity to putative O-repeat biosynthesis genes.

### Author Contributions

Conceived and designed the experiments: DCS. Performed the experiments: CJM SVB. Analyzed the data: DCS CJM SVB DDS. Contributed reagents/materials/analysis tools: DDS. Wrote the paper: DCS.



17. Danaher RJ, Levin JC, Arking D, Burch CL, Sandlin R, et al. (1995) Genetic basis of *Neisseria gonorrhoeae* lipooligosaccharide antigenic variation. *J Bacteriol* 177: 7275–7279.
18. Petricoin III EF, Danaher R, Stein DC (1991) Analysis of the *lsi* region involved in lipooligosaccharide biosynthesis in *Neisseria gonorrhoeae*. *J Bacteriol* 173: 7896–7902.
19. Sandlin RC, Danaher RC, Stein DC (1994) Genetic basis of pyocin resistance in *Neisseria gonorrhoeae*. *J Bacteriol* 176: 6869–6876.
20. Lucas CE, Hagman KE, Levin JC, Stein DC, Shafer WM (1995) Importance of lipooligosaccharide structure in determining gonococcal resistance to hydrophobic antimicrobial agents resulting from the *mtr* efflux system. *Mol Microbiol* 16: 1001–1009.
21. Klein NJ, Ison CA, Peakman M, Levin M, Hammerschmidt S, et al. (1996) The influence of capsulation and lipooligosaccharide structure on neutrophil adhesion molecule expression and endothelial injury by *Neisseria meningitidis*. *J Infect Dis* 173: 172–179.
22. Dixon GLJ, Heyderman RS, Kotovicz K, Jack DL, Andersen SR, et al. (1999) Endothelial adhesion molecule expression and its inhibition by recombinant bactericidal/permeability-increasing protein are influenced by the capsulation and lipooligosaccharide structure of *Neisseria meningitidis*. *Infect Immun* 67: 5626–5633.
23. Zughaier SM, Tzeng YL, Zimmer SM, Datta A, Carlson RW, et al. (2004) *Neisseria meningitidis* lipooligosaccharide structure-dependent activation of the macrophage CD14/Toll-like receptor 4 pathway. *Infect Immun* 72: 371–380.
24. Plant L, Sundqvist J, Zughaier SM, Lovkvist L, Stephens DS, et al. (2006) Lipooligosaccharide structure contributes to multiple steps in the virulence of *Neisseria meningitidis*. *Infect Immun* 74: 1360–1367.
25. Ram S, Cox AD, Wright JC, Vogel U, Getzlaff S, et al. (2003) Neisserial lipooligosaccharide is a target for complement component C4b: Inner core phosphoethanolamine residues define C4b linkage specificity. *J Biol Chem* 278: 50851–50862.
26. Tzeng YL, Datta A, Kolli VK, Carlson RW, Stephens DS (2002) Endotoxin of *Neisseria meningitidis* composed only of intact lipid A: inactivation of the meningococcal 3-deoxy-D-manno-octulosonic acid transferase. *J Bacteriol* 184: 2379–2388.
27. Zhou D, Lee NG, Apicella MA (1994) Lipooligosaccharide biosynthesis in *Neisseria gonorrhoeae*: cloning, identification and characterization of the alpha 1,5 heptosyltransferase I gene (*tfaC*). *Mol Microbiol* 14: 609–618.
28. Kahler CM, Carlson RW, Rahman MM, Martin LE, Stephens DS (1996) Two glycosyltransferase genes, *lgtF* and *tfaK*, constitute the lipooligosaccharide *ice* (inner core extension) biosynthesis operon of *Neisseria meningitidis*. *J Bacteriol* 178: 6677–6684.
29. Petricoin III EF, Stein DC (1989) Molecular analysis of lipooligosaccharide biosynthesis in *Neisseria gonorrhoeae*. *Infect Immun* 57: 2847–2852.
30. Gotschlich EC (1994) Genetic locus for the biosynthesis of the variable portion of *Neisseria gonorrhoeae* lipooligosaccharide. *J Exp Med* 180: 2181–2190.
31. Gilbert M, Watson DC, Cunningham AM, Jennings MP, Young NM, et al. (1996) Cloning of the lipooligosaccharide alpha-2,3-sialyltransferase from the bacterial pathogens *Neisseria meningitidis* and *Neisseria gonorrhoeae*. *J Biol Chem* 271: 28271–28276.
32. Snyder LAS, Davies JK, Ryan CS, Saunders NJ (2005) Comparative overview of the genomic and genetic differences between the pathogenic *Neisseria* strains and species. *Plasmid* 54: 191–218.
33. Maiden MC (2008) Population genomics: diversity and virulence in the *Neisseria*. *Curr Opin Microbiol* 11: 467–471.
34. Marri PR, Paniscus M, Weyand NJ, Rendon MA, Calton CM, et al. (2010) Genome sequencing reveals widespread virulence gene exchange among human *Neisseria* species. *PLoS One* 5: e11835.
35. Linz B, Schenker M, Zhu P, Achtman M (2000) Frequent interspecific genetic exchange between commensal *Neisseria* and *Neisseria meningitidis*. *Mol Microbiol* 36: 1049–1058.
36. van Passel MW, Bart A, Luyf AC, van Kampen AH, van der Ende A (2006) Identification of acquired DNA in *Neisseria lactamica*. *FEMS Microbiol Lett* 262: 77–84.
37. Sandlin R, Stein DC (1991) Structural heterogeneity of lipopolysaccharides the *Neisseriaceae*. *FEMS Microbiol Lett* 90: 69–72.
38. Jantzen E, Bryn K, Bovre K (1976) Cellular monosaccharide patterns of *Neisseriaceae*. *Acta Pathol Microbiol Scand [B]* 84: 177–188.
39. Parkhill J, Achtman M, James KD, Bentley SD, Churcher C, et al. (2000) Complete DNA sequence of a serogroup A strain of *Neisseria meningitidis* Z2491. *Nature* 404: 502–506.
40. White KA, Kaltashov IA, Cotter RJ, Raetz CRH (1997) A Mono-functional 3-Deoxy-d-manno-octulosonic Acid (Kdo) Transferase and a Kdo Kinase in Extracts of *Haemophilus influenzae*. *J Biol Chem* 272: 16555–16563.
41. Belunis CJ, Raetz CR (1992) Biosynthesis of endotoxins. Purification and catalytic properties of 3-deoxy-D-manno-octulosonic acid transferase from *Escherichia coli*. *J Biol Chem* 267: 9988–9997.
42. Belunis CJ, Mdluli KE, Raetz CR, Nano FE (1992) A novel 3-deoxy-D-manno-octulosonic acid transferase from *Chlamydia trachomatis* required for expression of the genus-specific epitope. *J Biol Chem* 267: 18702–18707.
43. Brabetz W, Muller-Loennies S, Brade H (2000) 3-Deoxy-d-manno-oct-2-ulosonic Acid (Kdo) Transferase (WaaA) and Kdo Kinase (KdkA) of *Haemophilus influenzae* Are Both Required to Complement a *waaA* Knockout Mutation of *Escherichia coli*. *J Biol Chem* 275: 34954–34962.
44. Yamasaki R, Bacon BE, Nasholds W, Schneider H, Griffiss JM (1991) Structural determination of oligosaccharides derived from lipooligosaccharide of *Neisseria gonorrhoeae* F62 by chemical, enzymatic, and two-dimensional NMR methods. *Biochem* 30: 10566–10575.
45. Yamasaki R, Koshino H, Kuroso S, Nishinaka Y, McQuillen DP, et al. (1999) Structural and immunochemical characterization of a *Neisseria gonorrhoeae* epitope defined by a monoclonal antibody 2C7; the antibody recognizes a conserved epitope on specific lipo-oligosaccharides in spite of the presence of human carbohydrate epitopes. *J Biol Chem* 274: 36550–36558.
46. Jennings HJ, Bhattacharjee AK, Kenne L, Kenny CP, Calver CG (1980) The R-type lipopolysaccharides of *Neisseria meningitidis*. *Can J Biochem* 58: 128–136.
47. Gamian A, Beurret M, Michon F, Brisson J-R, Jennings HJ (1992) Structure of the L2 lipopolysaccharide core oligosaccharide of *Neisseria meningitidis*. *J Biol Chem* 267: 922–925.
48. Michon F, Beurret M, Gamian A, Brisson JR, Jennings HJ (1990) Structure of the L5 lipopolysaccharide core oligosaccharides of *Neisseria meningitidis*. *J Biol Chem* 265: 7243–7247.
49. O'Connor ET, Zhou H, Bullock K, Swanson KV, Griffiss JM, et al. (2009) Structural characterization of an oligosaccharide made by *Neisseria sicca*. *J Bacteriol* 191: 3311–3320.
50. Buttcher V, Quanz M, Willmitzer L (1999) Molecular cloning, functional expression and purification of a glucan branching enzyme from *Neisseria denitrificans*. *Biochim Biophys Acta* 1432: 406–412.
51. Feil E, Zhou J, Maynard Smith J, Spratt BG (1996) A comparison of the nucleotide sequences of the *adk* and *recA* genes of pathogenic and commensal *Neisseria* species: evidence for extensive interspecies recombination within *adk*. *J Mol Evol* 43: 631–640.
52. Smith H, Parsons NJ, Cole JA (1995) Sialylation of neisserial lipopolysaccharide: a major influence on pathogenicity. *Microb Pathog* 19: 365–377.
53. Zhu P, Klutch MJ, Bash MC, Tsang RS, Ng LK, et al. (2002) Genetic diversity of three *lgt* loci for biosynthesis of lipooligosaccharide (LOS) in *Neisseria* species. *Microbiol* 148: 1833–1844.
54. Maniatis T, Fritsch EF, Sambrook J (1989) Molecular cloning: A laboratory manual Cold Spring Harbor Laboratory Press, New York.
55. Margulies M, Egholm M, Altman WE, Attiya S, Bader JS, et al. (2005) Genome sequencing in microfabricated high-density picolitre reactors. *Nature* 437: 376–380.
56. Delcher AL, Salzberg SL, Phillippy AM (2003) Using MUMmer to identify similar regions in large sequence sets. Current protocols in bioinformatics/ editorial board, Andreas D Baxevanis [et al] Chapter; Unit 10.13.
57. Drummond AJ, Ashton B, Buxton S, Cheung M, Cooper A, et al. (2009) Gencious v4.7.
58. Delcher AL, Bratke KA, Powers EC, Salzberg SL (2007) Identifying bacterial genes and endosymbiont DNA with Glimmer. *Bioinformatics (Oxford, England)* 23: 673–679.
59. Kerwood DE, Schneider H, Yamasaki R (1992) Structural analysis of lipooligosaccharide produced by *Neisseria gonorrhoeae*, strain MS11mk (variant A): a precursor for a gonococcal lipooligosaccharide associated with virulence. *Biochemistry* 31: 12760–12768.
60. Mandrell RE, Lesse AJ, Sugai JV, Shero M, Griffiss JM, et al. (1990) In vitro and in vivo modification of *Neisseria gonorrhoeae* lipooligosaccharide epitope structure by sialylation. *J Exp Med* 171: 1649–1664.
61. Tsai CM, Mocca LF, Frasch CE (1987) Immunotype epitopes of *Neisseria meningitidis* lipooligosaccharide types 1 through 8. *Infect Immun* 55: 1652–1656.
